# Supplementary material
Source: PubMed Central journal article supplement (PMC5116031)

## Supplementary Information.

**Table S1:** Residues at the interaction interface (a, d positions of heptad repeats) in the various BECN1/VPS30-containing dimers.

| <b>Dimer:</b>              | <b>BECN1 homodimer (anti-parallel)</b> |           | <b>Pairing</b> | <b>BECN1:ATG14 heterodimer (parallel)</b> |           | <b>Pairing</b> | <b>VPS30:VPS38 heterodimer (parallel)</b> |           |
|----------------------------|----------------------------------------|-----------|----------------|-------------------------------------------|-----------|----------------|-------------------------------------------|-----------|
| <b>Monomers:</b>           | BECN1                                  |           |                | BECN1                                     | ATG14     |                | VPS30                                     | VPS38     |
| <b>Heptad positions:</b>   | <b>a</b>                               | <b>d'</b> |                | <b>a</b>                                  | <b>a'</b> |                | <b>a</b>                                  | <b>a'</b> |
| <b>Interface residues:</b> | S177                                   | L264      | NI             | S177                                      | F92       | NI             |                                           |           |
|                            | L184                                   | A257      | OK             | L184                                      | A99       | OK             |                                           |           |
|                            | E191                                   | V250      | NI             | E191                                      | T106      | P              | E244                                      | R224      |
|                            | L198                                   | L243      | I              | L198                                      | I113      | I              | L251                                      | E231      |
|                            | R205                                   | F236      | NI             | R205                                      | I120      | NI             | D258                                      | L238      |
|                            | L212                                   | Y229      | NI             | L212                                      | I127      | I              | L265                                      | K245      |
|                            | A219                                   | L222      | OK             | A219                                      | M134      | OK             | K272                                      | L252      |
|                            | E226                                   | V215      | NI             | E226                                      | L141      | NI             | K279                                      | N259      |
|                            | Y233                                   | V208      | NI             | Y233                                      | N148      | NI             |                                           |           |
|                            | Q240                                   | V201      | NI             | Q240                                      | A155      | NI             | N293                                      | E272      |
|                            | L247                                   | L194      | I              | L247                                      | K162      | NI             | L300                                      | G279      |
|                            | M254                                   | L187      | OK             | M254                                      | N169      | NI             | F307                                      | V286      |
| L261                       | L180                                   | I         | L261           | V176                                      | I         | L314           | D293                                      |           |
| <b>Heptad positions:</b>   | <b>d</b>                               | <b>a'</b> |                | <b>d</b>                                  | <b>d'</b> |                | <b>d</b>                                  | <b>d'</b> |
| <b>Interface residues:</b> | L180                                   | L261      | I              | L180                                      | E95       | NI             |                                           |           |
|                            | L187                                   | M254      | OK             | L187                                      | G102      | NI             |                                           |           |
|                            | L194                                   | L247      | I              | L194                                      | L109      | I              | L247                                      | Q227      |
|                            | V201                                   | Q240      | NI             | V201                                      | C116      | NI             | L254                                      | E234      |
|                            | V208                                   | Y233      | NI             | V208                                      | L123      | I              | L261                                      | K241      |
|                            | V215                                   | E226      | NI             | V215                                      | G130      | NI             | L268                                      | E248      |
|                            | L222                                   | A219      | OK             | L222                                      | N137      | NI             | L275                                      | N255      |
|                            | Y229                                   | L212      | NI             | Y229                                      | T144      | P              | K282                                      | T263      |
|                            | F236                                   | R205      | NI             | F236                                      | L151      | OK             |                                           |           |
|                            | L243                                   | L198      | I              | L243                                      | H158      | NI             | F296                                      | N275      |
|                            | V250                                   | E191      | NI             | V250                                      | I165      | I              | L303                                      | Y282      |
|                            | A257                                   | L184      | OK             | A257                                      | L172      | OK             | S310                                      | K289      |
| L264                       | S177                                   | NI        |                |                                           |           |                |                                           |           |

**Pairing Key:** I: Ideal; NI: Non-Ideal; OK: Acceptable hydrophobic; P: paired polar residues

**Figure S1. ATG14 sequence alignment.** Sequence alignment of predicted CCDs from five diverse eukaryotic ATG14 proteins. Yellow, orange and red represent increasing sequence conservation, with red corresponding to invariant residues. Predicted secondary structures are shown below the sequence alignment. The predicted CCD region used in this study is boxed. Conserved residues involved in hydrophobic pairing in the heterodimer, that were selected for mutagenesis are indicated by red arrowheads.

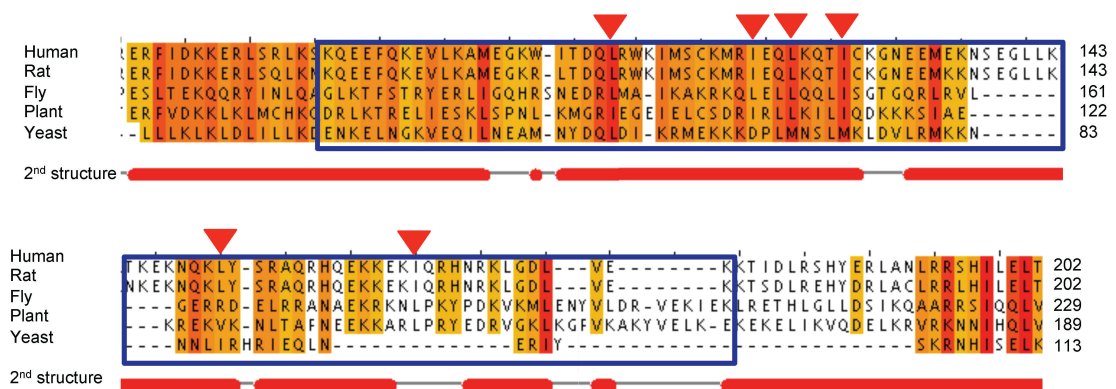

**Figure S2. SEC purification of the BECN1:ATG14 CCD heterodimer complex.**

SEC curves shown correspond to BECN1 CCD (green) and BECN1:ATG14 CCD (blue). Elution positions for different molecular weight markers are indicated. The molecular weight calculated from SEC is indicated. SDS-PAGE analysis of the peak fractions is shown.

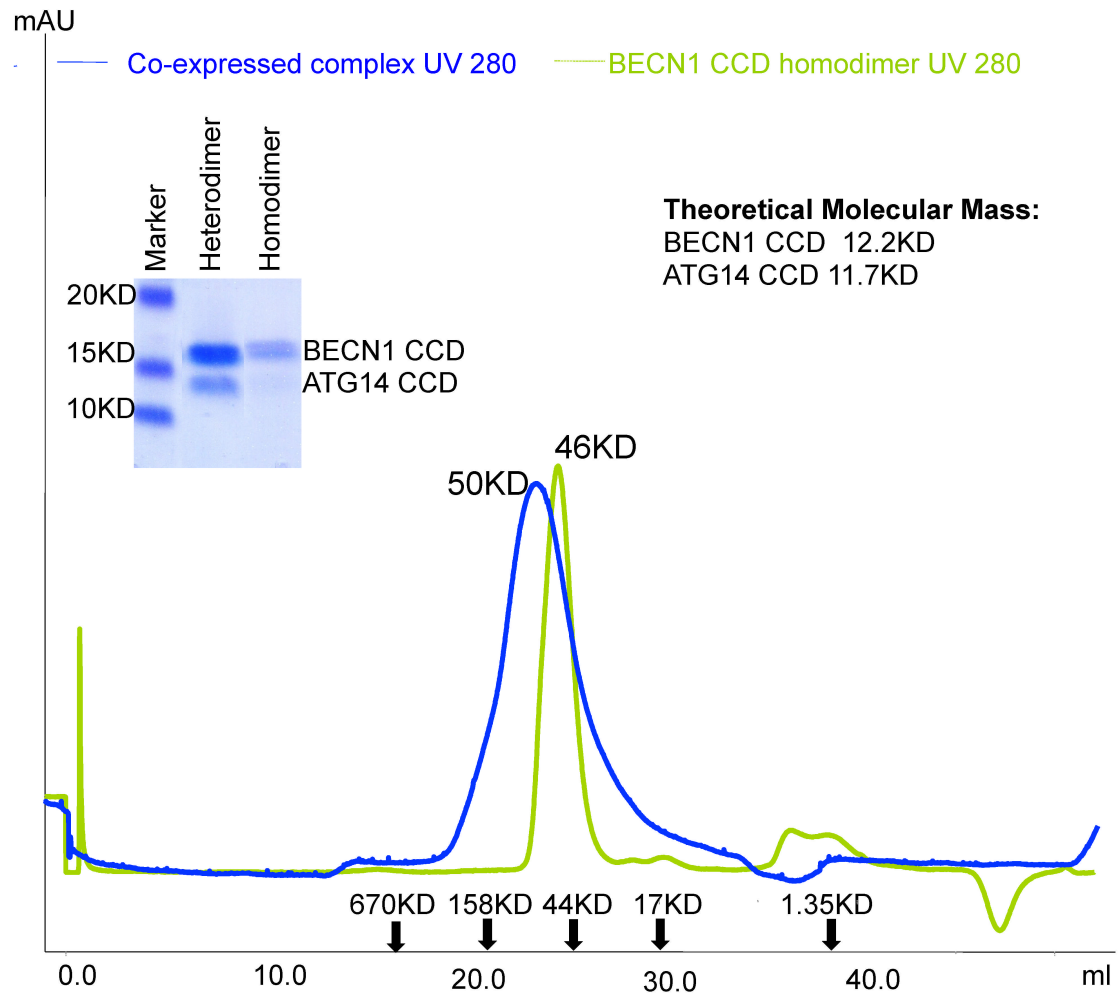

**Figure S3. CD spectra of different CCDs.** The spectra for the MBP-ATG14 CCD fusion protein, the BECN1:ATG14 CCD complex, the BECN1 CCD, and MBP are color coded as indicated in the legend.

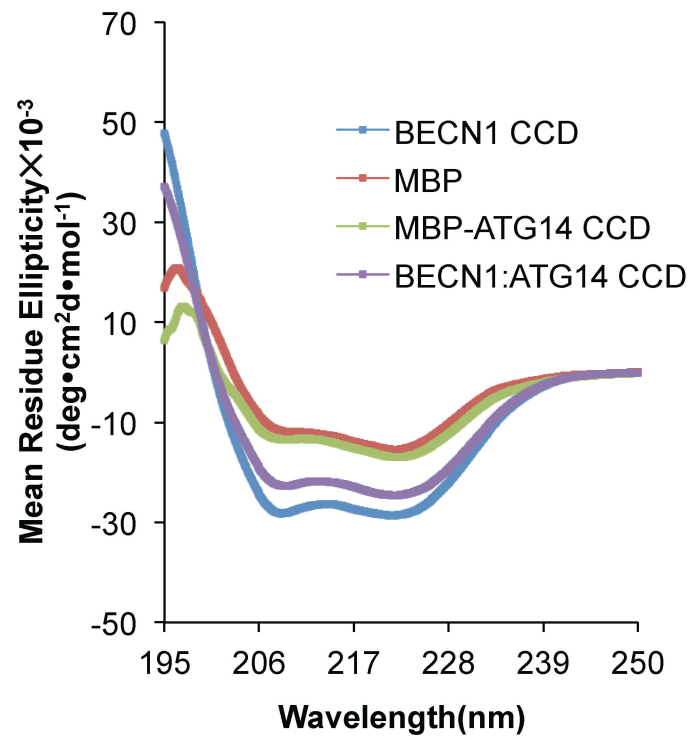

**Figure S4. Comparison of BECN1 CCD containing dimers.** All proteins are rendered in ribbon, colored as follows: BECN1, magenta; ATG14, wheat; VPS30, yellow and VPS38, green. The residues involved in interface interactions are shown in stick with atoms color-coded by atom type: O, red; N, blue; S, yellow; and C, colored according to main chain ribbon for that molecule. Superposition of (A) BECN1:ATG14 CCD complex and the BECN1 CCD homodimer. (B) VPS30:VPS38 complex and the BECN1 CCD homodimer. (C) BECN1:ATG14 CCD complex and the VPS30:VPS38 complex.

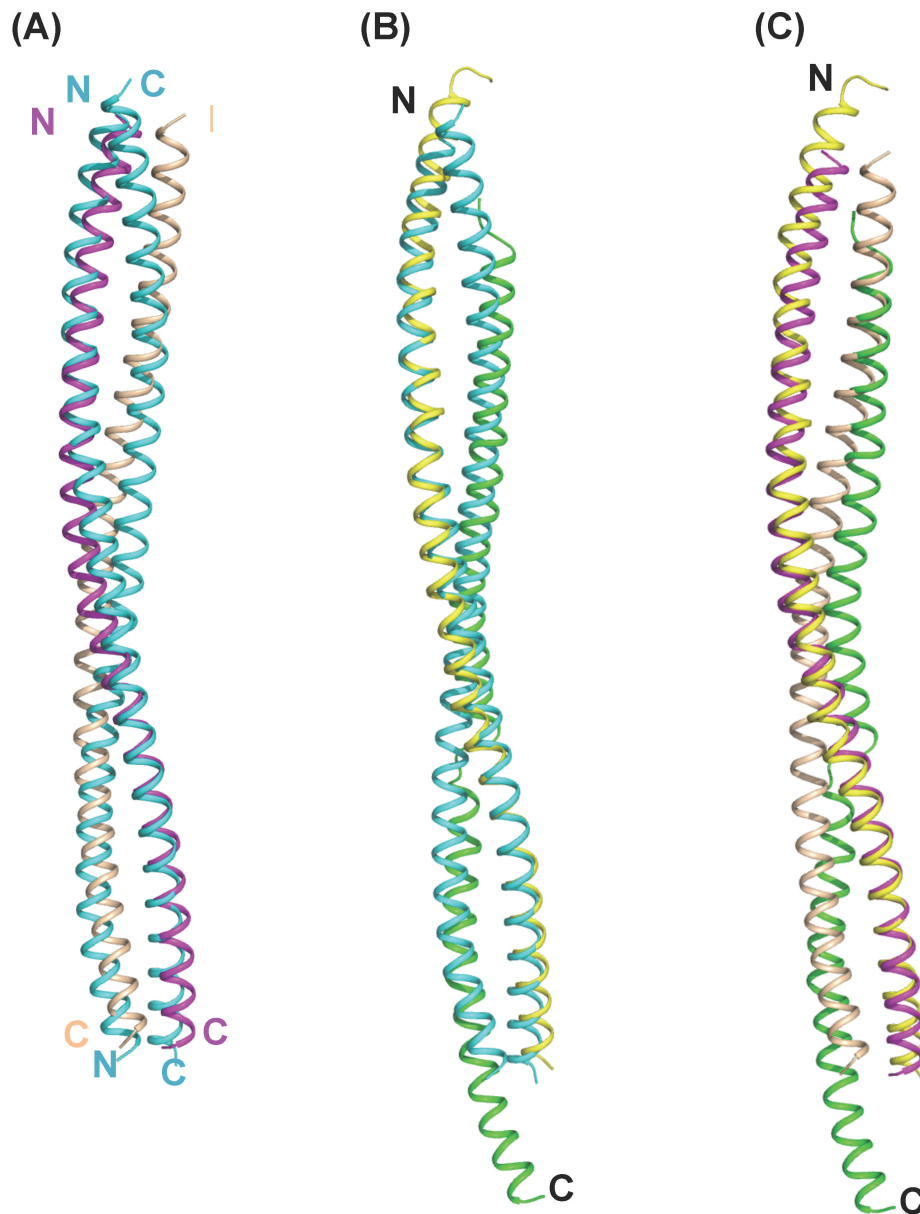

**Figure S5. Displacement of the BECN1 BARAD domain due to the curved BECN1:ATG14 quaternary structure.** All proteins are shown in ribbon, colored as follows: BECN1, magenta; ATG14, wheat; VPS30, yellow; VPS38, green; VPS15, grey, and VPS34, blue. Protein domains implicated in membrane interaction, the BECN1 BARAD, VPS38 BARAD and PI3KC3 catalytic domain are labeled. Arrows indicate altered positions of equivalent BECN1/VPS30 residues in a complex containing ATG14.

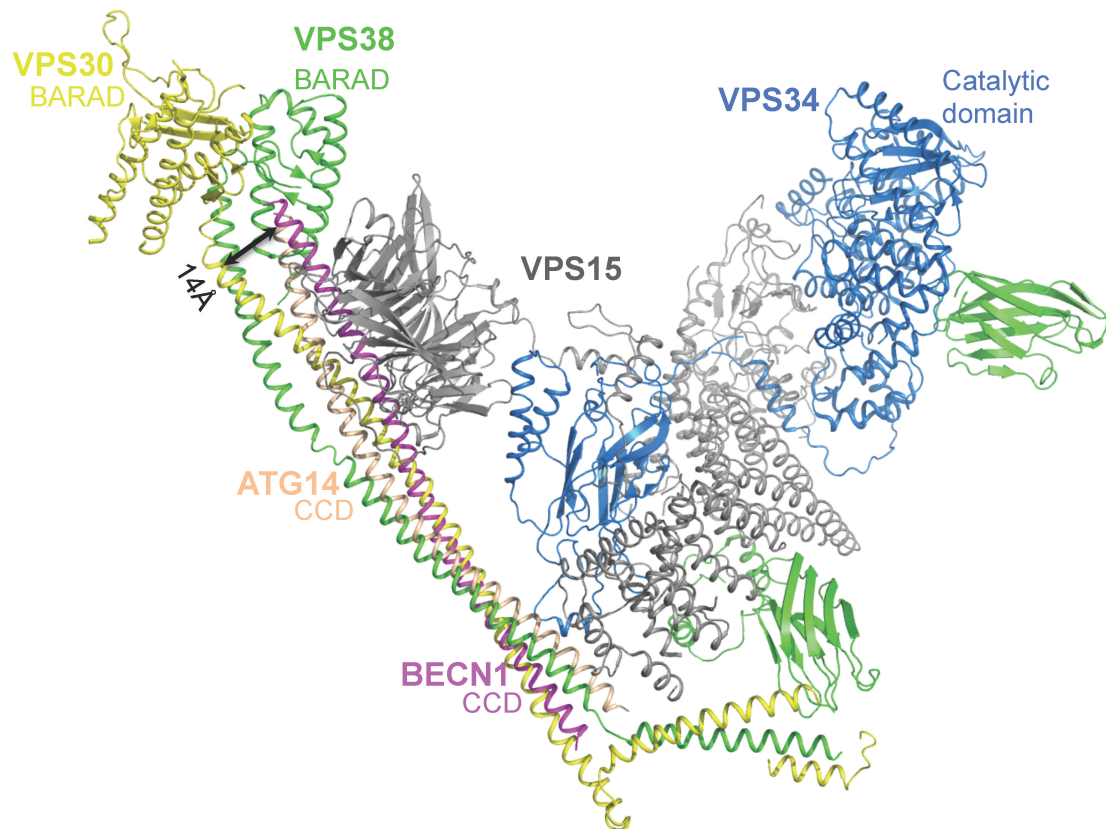

Supplement: NIHMS825832-supplement-SI.pdf [file NIHMS825832-supplement-SI.pdf]
